# Supplementary material
Source: PubMed Central journal article supplement (PMC4790695)
Supplement: geeg005039.wt1_default.pdf [file geeg005039.wt1_default.pdf]

**Appendix I: Composite reference standard used in AMUSE-2**

| <b>PE confirmed</b>                                                                                                              | <b>PE refuted – no anticoagulant treatment.</b>                                                                                                                                                                |
|----------------------------------------------------------------------------------------------------------------------------------|----------------------------------------------------------------------------------------------------------------------------------------------------------------------------------------------------------------|
| Spiral CT scanning demonstrating central, or (sub) segmental PE                                                                  | Spiral CT scanning demonstrating no signs of PE, plus 3 months of uneventful follow-up in primary care                                                                                                         |
| Ventilation-perfusion scanning findings demonstrating PE, in accordance with the PIOPED II study protocol #                      | Ventilation-perfusion scanning findings without signs of PE, in accordance with the PIOPED II study protocol #, plus 3 months of uneventful follow-up in primary care                                          |
| Digital subtraction angiography demonstrating PE                                                                                 | Digital subtraction angiography without signs of PE, plus 3 months of uneventful follow-up in primary care                                                                                                     |
| Compression ultrasonography demonstrating proximal deep vein thrombosis in a patient with clinical symptoms and signs of PE      | If no imaging test was performed in secondary care ¥, PE was also considered refuted if uneventful follow-up of at least three months in primary care demonstrated no signs of acute venous thrombo-embolism § |
| Wells-PE rule $\leq 4$ AND negative quantitative D-dimer test, but with a VTE event during 3 months of follow-up in primary care | Wells-PE rule $\leq 4$ AND negative quantitative D-dimer test, and 3 months of uneventful follow-up in primary care                                                                                            |

§ Patients received follow-up in primary care; follow-up was considered uneventful if a patient was not diagnosed with acute PE or deep vein thrombosis during 3 months of follow-up

¥ For example because of a low clinical probability assessment plus a negative D-dimer test as performed in secondary care, or because after referral an alternative diagnosis was found that completely explained the symptoms of an included patient (at the discretion of the attending physician)

# Sostman, H.D., et al., *Acute pulmonary embolism: sensitivity and specificity of ventilation-perfusion scintigraphy in PIOPED II study*. Radiology, 2008. **246**(3):941-6.
