# Supplementary material
Source: PubMed Central journal article supplement (PMC4790695)
Supplement: geeg005039.wt2_default.pdf [file geeg005039.wt2_default.pdf]

**Appendix II: Final diagnoses made in 57 patients where no initial imaging was performed, despite a high Wells score (see also Figure 1)**

| <b>Final diagnosis</b>                     | <b>N</b> |
|--------------------------------------------|----------|
| Myalgia or thoracic chest pain             | 26       |
| Pneumonia or respiratory tract infection   | 16       |
| Thoracic trauma                            | 2        |
| Heart failure                              | 2        |
| Acute coronary syndrome                    | 1        |
| Pericarditis                               | 1        |
| Exacerbation COPD                          | 1        |
| Panic disorder                             | 1        |
| Obesity (Pickwick syndrome)                | 1        |
| Diabetic ketoacidosis                      | 1        |
| Sarcoidosis                                | 1        |
| Airway obstruction                         | 1        |
| Unknown                                    | 1        |
| Venous thrombo-embolism during follow-up # | 2        |

# both patient diagnosed with DVT shortly after referral
